# Supplementary material
Source: PubMed Central journal article supplement (PMC4234599)
Supplement: pnas.1415271111.sd01.pdf [file pnas.1415271111.sd01.pdf]

HOME

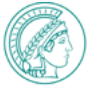

MAX-PLANCK-GESSELLSCHAFT

Show results of job:

Recent jobs:

Select all Deselect all  
  
  

|         |
|---------|
| queued  |
| running |
| done    |
| error   |

[Login](#) | 
 [PDBAlert](#) | 
 [Personal Databases](#) | 
 [Contact](#) | 
 [Tool Versions](#) | 
 [Imprint](#) | 
 [Disclaimer](#) | 
 [Help](#)

# Bioinformatics Toolkit

Max-Planck Institute for Developmental Biology

Quickfinder

[Search](#) | 
 [Alignment](#) | 
 [Sequence Analysis](#) | 
 [2ary Structure](#) | 
 [3ary Structure](#) | 
 [Classification](#) | 
 [Utils](#)

[CS-BLAST](#) | 
 [HHblits](#) | 
 [HHpred](#) | 
 [HHsenser](#) | 
 [HMMER3](#) | 
 [PatternSearch](#) | 
 [ProtBLAST](#) | 
 [PSI-BLAST](#) | 
 [SimShiftDB](#)  
[New job](#) | 
[Resubmit](#) | 
[Resubmit\\_HMM](#) | 
[Resubmit/HHsenser](#) | 
[Realign](#) | 
[Log](#) | 
[Input-params](#) | 
[Delete](#)

HHpred - Results Job-ID: 4234647 Date: 14:24 on Mar 21 2014

[Help](#)

[Results](#) | 
 [Histogram](#) | 
 [Reduced alignment](#) | 
 [Representative alignment](#) | 
 [Full alignment](#)  
[Create model](#) | 
[Merge Q/T alignments](#) | 
[Forward to PCoils](#) | 
[Forward HMM](#) | 
[Save](#) | 
[Export](#)

Color alignments

color only SS | 
  color alignments | 
  color alignments

[View alignment](#)

\*Note\*: click [PDBAlert](#) to upload your query sequence and get alerted by email as soon as better PDB templates get available.

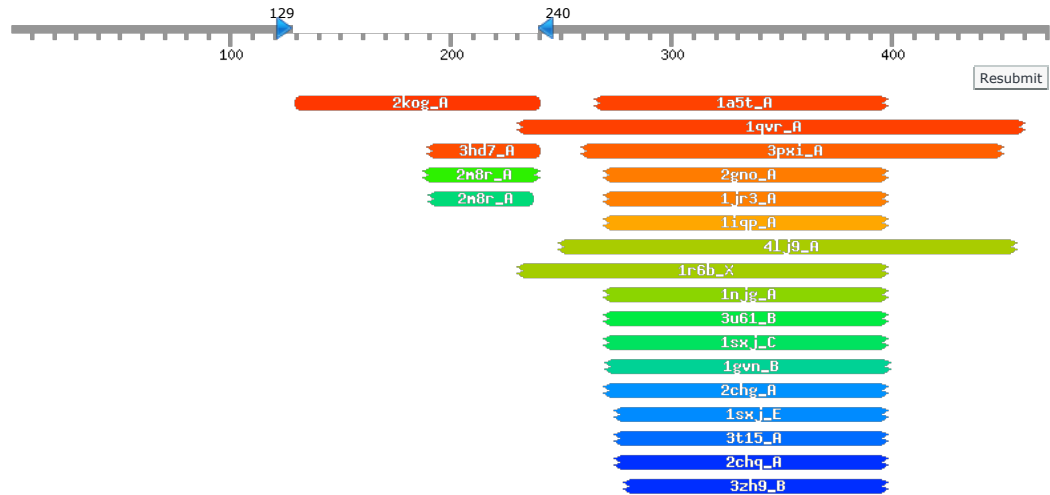

HHpred has detected hits to coiled coil-containing proteins. You may consider running a PCOILS prediction on your query.

Query lull1 (seq=MADSGLEPQ...SSIEQGCLF Len=470 Neff=3.6 Nseqs=81)  
 Parameters score SS:yes search:local realign with MAP:no

| No                       | Hit                               | Prob | E-value | P-value | Score | SS   | Cols | Query   | HMM | Template | HMM   |
|--------------------------|-----------------------------------|------|---------|---------|-------|------|------|---------|-----|----------|-------|
| <input type="checkbox"/> | 1 2kog_A Vesicle-associated memb  | 95.3 | 0.015   | 4.6E-07 | 50.7  | 4.2  | 112  | 129-240 |     | 1-119    | (119) |
| <input type="checkbox"/> | 2 1qvr_A CLPB protein; coiled co  | 94.6 | 0.55    | 1.7E-05 | 52.2  | 15.0 | 206  | 231-459 |     | 526-756  | (854) |
| <input type="checkbox"/> | 3 1a5t_A Delta prime, HOLB; zinc  | 94.4 | 0.2     | 6.2E-06 | 48.2  | 9.7  | 122  | 266-397 |     | 4-144    | (334) |
| <input type="checkbox"/> | 4 3hd7_A Vesicle-associated memb  | 93.5 | 0.2     | 6.2E-06 | 41.5  | 6.8  | 51   | 190-240 |     | 39-91    | (91)  |
| <input type="checkbox"/> | 5 3pxi_A Negative regulator of g  | 92.0 | 2.9     | 9E-05   | 46.3  | 15.4 | 174  | 260-449 |     | 487-673  | (758) |
| <input type="checkbox"/> | 6 2gno_A DNA polymerase III, gam  | 89.5 | 1       | 3.2E-05 | 42.7  | 7.9  | 116  | 270-397 |     | 2-118    | (305) |
| <input type="checkbox"/> | 7 1jr3_A DNA polymerase III subu  | 89.3 | 2.3     | 7.1E-05 | 41.2  | 10.2 | 115  | 270-397 |     | 21-155   | (373) |
| <input type="checkbox"/> | 8 1iqp_A RFCS; clamp loader, ext  | 85.9 | 2.9     | 9.1E-05 | 39.7  | 8.6  | 116  | 270-397 |     | 30-146   | (327) |
| <input type="checkbox"/> | 9 4lj9_A Chaperone protein CLPB;  | 80.0 | 11      | 0.00036 | 37.1  | 10.4 | 186  | 250-455 |     | 29-238   | (339) |
| <input type="checkbox"/> | 10 1r6b_X CLPA protein; AAA+, N-t | 79.7 | 38      | 0.0012  | 37.8  | 15.4 | 157  | 231-397 |     | 426-604  | (758) |
| <input type="checkbox"/> | 11 1njg_A DNA polymerase III subu | 78.2 | 13      | 0.00041 | 34.4  | 9.7  | 117  | 270-397 |     | 28-162   | (250) |
| <input type="checkbox"/> | 12 2m8r_A Syntaxin-1A; snare, pre | 72.7 | 10      | 0.00032 | 31.6  | 6.7  | 52   | 188-239 |     | 46-108   | (109) |
| <input type="checkbox"/> | 13 3u6l_B DNA polymerase accessor | 66.1 | 27      | 0.00084 | 32.8  | 8.9  | 104  | 270-397 |     | 31-142   | (324) |
| <input type="checkbox"/> | 14 1sxj_C Activator 1 40 kDa subu | 64.4 | 15      | 0.00047 | 35.3  | 7.0  | 116  | 270-397 |     | 30-146   | (340) |
| <input type="checkbox"/> | 15 2m8r_A Syntaxin-1A; snare, pre | 62.9 | 3.3     | 0.0001  | 34.6  | 1.8  | 47   | 191-237 |     | 63-109   | (109) |
| <input type="checkbox"/> | 16 1gvn_B Zeta; postsegregational | 61.2 | 1.1E+02 | 0.0034  | 28.2  | 12.5 | 118  | 271-398 |     | 10-146   | (287) |
| <input type="checkbox"/> | 17 2chg_A Replication factor C sm | 52.3 | 62      | 0.0019  | 28.6  | 8.3  | 116  | 270-397 |     | 22-138   | (226) |
| <input type="checkbox"/> | 18 1sxj_E Activator 1 40 kDa subu | 51.7 | 1.3E+02 | 0.004   | 28.3  | 10.8 | 119  | 275-397 |     | 20-170   | (354) |
| <input type="checkbox"/> | 19 3t15_A Ribulose biphosphate c  | 49.1 | 1.5E+02 | 0.0047  | 28.1  | 10.9 | 117  | 275-397 |     | 18-161   | (293) |
| <input type="checkbox"/> | 20 2chg_A Replication factor C sm | 44.1 | 54      | 0.0017  | 30.4  | 6.9  | 115  | 275-397 |     | 23-138   | (319) |
| <input type="checkbox"/> | 21 3zh9_B Delta; hydrolase, repli | 43.9 | 42      | 0.0013  | 32.3  | 6.2  | 106  | 279-397 |     | 3-118    | (347) |
| <input type="checkbox"/> | 22 1sxj_B Activator 1 37 kDa subu | 39.6 | 1.3E+02 | 0.0042  | 28.2  | 8.9  | 110  | 270-397 |     | 26-143   | (323) |
| <input type="checkbox"/> | 23 3pe5_A Uncharacterized protein | 38.6 | 7.2     | 0.00022 | 39.9  | 0.0  | 53   | 187-239 |     | 5-57     | (403) |
| <input type="checkbox"/> | 24 2yhs_A FTSY, cell division pro | 34.5 | 2.5E+02 | 0.0078  | 28.7  | 10.6 | 130  | 250-395 |     | 243-381  | (503) |
| <input type="checkbox"/> | 25 1shu_X Anthrax toxin receptor  | 32.3 | 1E+02   | 0.0031  | 26.5  | 6.3  | 121  | 249-382 |     | 60-182   | (182) |
| <input type="checkbox"/> | 26 2bjv_A PSP operon transcriptio | 31.9 | 3.4E+02 | 0.011   | 25.4  | 10.5 | 127  | 259-397 |     | 1-147    | (265) |
| <input type="checkbox"/> | 27 1jq1_B DNA polymerase III, del | 28.9 | 1.4E+02 | 0.0045  | 25.1  | 6.6  | 104  | 281-397 |     | 9-113    | (140) |
| <input type="checkbox"/> | 28 3arc_L Photosystem II reaction | 28.0 | 53      | 0.0017  | 23.8  | 3.0  | 20   | 220-239 |     | 16-35    | (37)  |
| <input type="checkbox"/> | 29 1v7p_C Integrin alpha-2; snake | 27.7 | 1.3E+02 | 0.0039  | 26.5  | 6.2  | 128  | 252-385 |     | 66-199   | (200) |
| <input type="checkbox"/> | 30 3te6_A Regulatory protein SIR3 | 21.4 | 4.7E+02 | 0.015   | 25.8  | 9.6  | 118  | 274-397 |     | 29-169   | (318) |
| <input type="checkbox"/> | 31 4i9w_A Potassium channel subfa | 21.2 | 4E+02   | 0.012   | 25.6  | 8.8  | 96   | 186-287 |     | 2-97     | (309) |
| <input type="checkbox"/> | 32 2og2_A Putative signal recogni | 20.1 | 4.5E+02 | 0.014   | 26.6  | 9.2  | 66   | 252-317 |     | 107-183  | (359) |

No 1

>2kog\_A Vesicle-associated membrane protein 2; synaptobrevin, VAMP2, DPC micelle, snare, coiled coil, membrane
