# Supplementary material
Source: PubMed Central journal article supplement (PMC4234599)
Supplement: pnas.1415271111.sd02.pdf [file pnas.1415271111.sd02.pdf]

HOME

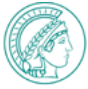

MAX-PLANCK-GESSELLSCHAFT

Show results of job:



Recent jobs:

Select all Deselect all

|         |
|---------|
| queued  |
| running |
| done    |
| error   |

[Login](#) | [PDBAlert](#) | [Personal Databases](#) | [Contact](#) | [Tool Versions](#) | [Imprint](#) | [Disclaimer](#) | [Help](#)

# Bioinformatics Toolkit

Max-Planck Institute for Developmental Biology

[Search](#) | [Alignment](#) | [Sequence Analysis](#) | [2ary Structure](#) | [3ary Structure](#) | [Classification](#) | [Utils](#)

[CS-BLAST](#) | [HHblits](#) | [HHpred](#) | [HHsenser](#) | [HMMER3](#) | [PatternSearch](#) | [ProtBLAST](#) | [PSI-BLAST](#) | [SimShiftDB](#)  
[New job](#) | [Resubmit](#) | [Resubmit\\_HMM](#) | [Resubmit/HHsenser](#) | [Realign](#) | [Log](#) | [Input-params](#) | [Delete](#)

HHpred - Results Job-ID: 8752049 Date: 14:24 on Mar 21 2014

[Help](#)

[Results](#) | [Histogram](#) | [Reduced alignment](#) | [Representative alignment](#) | [Full alignment](#)  
[Create model](#) | [Merge Q/T alignments](#) | [Forward to PCoils](#) | [Forward HMM](#) | [Save](#) | [Export](#)

Color alignments

color only SS |  color alignments |  color alignments

[View alignment](#)

**\*Note\*:** click [PDBAlert](#) to upload your query sequence and get alerted by email as soon as better PDB templates get available.

**Note:** Corrupted alignments are the most common source of high-scoring false positives. Check the query alignment by clicking Show Query Alignment above. To check the template alignments use the logos.

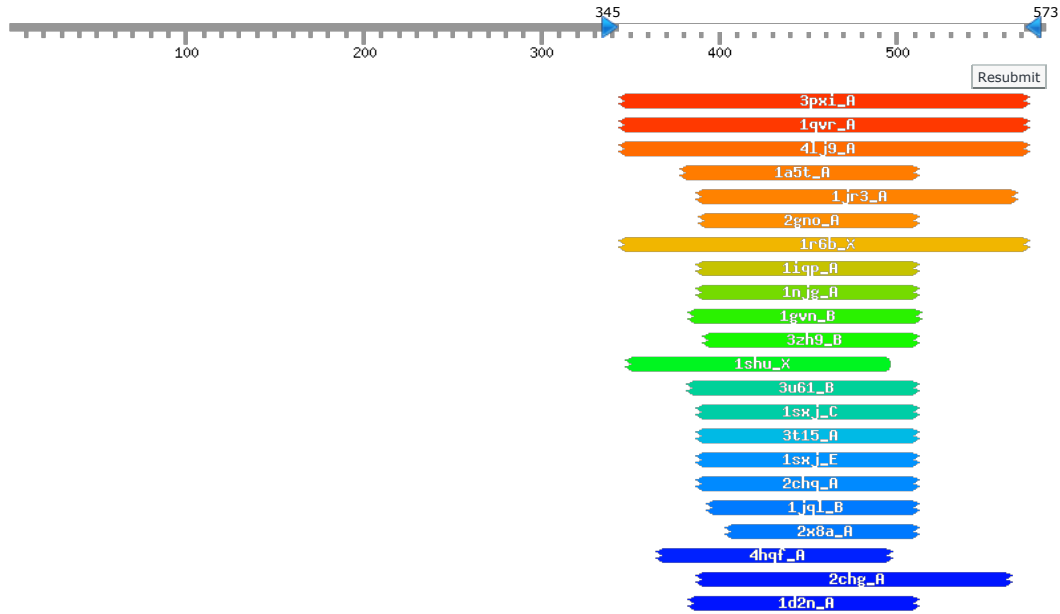

HHpred has detected hits to coiled coil-containing proteins. You may consider running a PCOILS prediction on your query.

**Query** lap1 (seq=MAGDGRRAEA...ENALKRGICL Len=583 Neff=3.3 Nseqs=77)  
**Parameters** score SS:yes search:local realign with MAP:no

| No Hit                                                     | Prob | E-value | P-value | Score | SS   | Cols | Query HMM | Template HMM  |
|------------------------------------------------------------|------|---------|---------|-------|------|------|-----------|---------------|
| <input type="checkbox"/> 1 3pxi_A Negative regulator of g  | 95.6 | 0.14    | 4.4E-06 | 57.7  | 14.2 | 193  | 345-573   | 459-661 (758) |
| <input type="checkbox"/> 2 1qvr_A CLPB protein; coiled co  | 95.2 | 0.28    | 8.7E-06 | 55.7  | 15.0 | 206  | 345-573   | 526-756 (854) |
| <input type="checkbox"/> 3 4lj9_A Chaperone protein CLPB;  | 91.0 | 2.3     | 7.3E-05 | 42.9  | 12.3 | 208  | 345-573   | 11-241 (339)  |
| <input type="checkbox"/> 4 1a5t_A Delta prime, HOLB; zinc  | 89.5 | 2       | 6.3E-05 | 42.1  | 10.2 | 123  | 379-511   | 4-144 (334)   |
| <input type="checkbox"/> 5 1jr3_A DNA polymerase III subu  | 89.0 | 5.9     | 0.00019 | 39.1  | 13.2 | 158  | 388-566   | 22-211 (373)  |
| <input type="checkbox"/> 6 2gno_A DNA polymerase III, gam  | 88.0 | 2.4     | 7.6E-05 | 41.0  | 9.5  | 113  | 390-511   | 5-118 (305)   |
| <input type="checkbox"/> 7 1r6b_X CLPA protein; AAA+, N-t  | 84.2 | 20      | 0.00064 | 40.8  | 15.6 | 206  | 345-573   | 426-652 (758) |
| <input type="checkbox"/> 8 1iqp_A RFCS; clamp loader, ext  | 81.7 | 4.7     | 0.00015 | 39.1  | 8.3  | 115  | 388-511   | 31-146 (327)  |
| <input type="checkbox"/> 9 1njg_A DNA polymerase III subu  | 76.9 | 15      | 0.00048 | 34.7  | 9.9  | 117  | 388-511   | 29-162 (250)  |
| <input type="checkbox"/> 10 1gvn_B Zeta; postsegregational | 72.5 | 37      | 0.0012  | 32.1  | 11.4 | 119  | 384-512   | 10-146 (287)  |
| <input type="checkbox"/> 11 3zh9_B Delta; hydrolase, repli | 71.3 | 9.6     | 0.0003  | 37.6  | 7.2  | 106  | 392-511   | 3-118 (347)   |
| <input type="checkbox"/> 12 1shu_X Anthrax toxin receptor  | 68.1 | 9.8     | 0.00031 | 33.7  | 6.0  | 135  | 349-496   | 44-182 (182)  |
| <input type="checkbox"/> 13 3u61_B DNA polymerase accessor | 61.0 | 41      | 0.0013  | 32.3  | 9.3  | 104  | 383-511   | 31-142 (324)  |
| <input type="checkbox"/> 14 1sxj_C Activator 1 40 kDa subu | 60.2 | 28      | 0.00088 | 34.2  | 8.1  | 115  | 388-511   | 31-146 (340)  |
| <input type="checkbox"/> 15 3t15_A Ribulose biphosphate c  | 56.5 | 56      | 0.0017  | 31.8  | 9.4  | 117  | 388-511   | 18-161 (293)  |
| <input type="checkbox"/> 16 1sxj_E Activator 1 40 kDa subu | 52.4 | 1.4E+02 | 0.0045  | 28.6  | 11.5 | 119  | 388-511   | 20-170 (354)  |
| <input type="checkbox"/> 17 2chg_A Replication factor C sm | 51.6 | 42      | 0.0013  | 31.9  | 7.5  | 115  | 388-511   | 23-138 (319)  |
| <input type="checkbox"/> 18 1jql_B DNA polymerase III, del | 50.3 | 59      | 0.0018  | 28.2  | 7.7  | 99   | 394-511   | 9-113 (140)   |
| <input type="checkbox"/> 19 2x8a_A Nuclear valosin-contain | 50.2 | 1.3E+02 | 0.0041  | 28.9  | 10.8 | 100  | 405-511   | 42-152 (274)  |
| <input type="checkbox"/> 20 4hqf_A Thrombospondin-related  | 42.8 | 1.7E+02 | 0.0053  | 27.9  | 10.3 | 117  | 366-496   | 87-210 (281)  |
| <input type="checkbox"/> 21 2chg_A Replication factor C sm | 41.8 | 2.1E+02 | 0.0065  | 25.8  | 13.0 | 158  | 388-563   | 23-192 (226)  |
| <input type="checkbox"/> 22 1d2n_A N-ethylmaleimide-sensit | 41.7 | 2.7E+02 | 0.0084  | 27.0  | 14.3 | 120  | 384-511   | 43-173 (272)  |
| <input type="checkbox"/> 23 2bjv_A PSP operon transcriptio | 37.3 | 2.5E+02 | 0.0079  | 26.9  | 10.6 | 127  | 372-511   | 1-147 (265)   |
| <input type="checkbox"/> 24 4b4t_H 26S protease regulatory | 35.9 | 1.5E+02 | 0.0047  | 31.5  | 9.5  | 101  | 405-511   | 241-354 (467) |
| <input type="checkbox"/> 25 2lco_A WALP19-P8 peptide; pro  | 35.2 | 27      | 0.00086 | 24.0  | 2.4  | 17   | 337-353   | 3-19 (26)     |
| <input type="checkbox"/> 26 1jr3_D DNA polymerase III, del | 33.6 | 3.7E+02 | 0.011   | 26.3  | 12.1 | 105  | 394-512   | 9-114 (343)   |
| <input type="checkbox"/> 27 2lcn_A WALP19-P10 peptide; pro | 33.5 | 30      | 0.00095 | 23.8  | 2.4  | 17   | 337-353   | 3-19 (26)     |



T lqvr\_A 744 FLNRL-DEIVVFRP 756 (854)
T ss\_dssp HHHTC-SBCCBCCC
T ss\_pred Hhhc-CeEEeCCc

No 3 [Icons: PDB, SCOP, NCBI, PubMed]

>4lj9\_A Chaperone protein CLPb; AAA+ protein, nucleotide binding domain, molecular chaperone disaggregase; HET: ACP; 1.70A {Thermus thermophilus}; PDB: 4lj8\_A\* 4lja\_A\* 4lj6\_A\* 4lj4\_A\* 4lj5\_A\* 4lj7\_A\* 4fd2\_A\* 4fct\_A\* 4fc4fcv\_A\*
Probab=90.98 E-value=2.3 Score=42.90 Aligned\_cols=208 Identities=14% Similarity=0.197 Sum\_probs=0.0

Q ss\_pred HHHHHHHhhcCCcccCchHHHHHHHHHHhhcCCCCHHHHHHHHHHhhcCCCCCceEEEEcCc---ccHHHH
Q lqvr\_A 345 AALASGSPWFSTPEVETTAVQEFQNMNQLKNKYQGQDEKLWKRSTFLEKHLNSSHPRSQPALLLTAAR--DABEAL 422 (583)
Q Consensus 345 lai-vg-----Pqv--tave-f-----qLkSkFPsQse-LWkrlr--LekhLnts-Pr-ePAVLLtA-----Ae-TL 422 (583)

Q ss\_pred HHHHHHHHHhhccccCceeEecCccccChhh-----HHHHHHHHHHhhcCCcEEEEehhhCCHHHH
Q lqvr\_A 423 RCLSEQIADAYSSFRSRAIRIDGTDKATQDSDT-----VKLEVDQELNSGPKNGQAAVHRFESFPAGST 489 (583)
Q Consensus 423 qClae-IAdaysS--s--aI-IDG--a--DSD-----vKleIDeqLks-F--g-kaAVVh-LE-LPP-Aa 489 (583)

Q ss\_pred HHHHHhCC-----CCcCcccEEEEEeccccccCChHHHHHHHHHHhhccccccccCChhhchHH
Q lqvr\_A 490 LIFKYCDH-----ENAAFKDVALVLTVLEETLGTSLGLKEVEKVRDFLKVKTNSNTPNYNHMDPKLNGLW 561 (583)
Q Consensus 490 LIIFH-YCDH-----ENA-fkDValfLTV-leeetl--s-slkeVEkV-dfL--k-----swN-Md-DklDgLI 561 (583)

Q ss\_pred HhhcCeEEec
Q lqvr\_A 562 SRISHLVLPVQP 573 (583)
Q Consensus 562 SRISh-VLpVqP 573 (583)
T Consensus 231 -R---i-f-- 241 (339)
T 4lj9\_A 231 NRL-DEIVVFRP 241 (339)
T ss\_dssp TTS-SEEEeCCc
T ss\_pred ccC-CEEEeCCc

No 4 [Icons: PDB, SCOP, NCBI, PubMed]

>1a5t\_A Delta prime, HOLB; zinc finger, DNA replication; 2.20A {Escherichia coli K12}; SCOP: a.80.1.1 c.37.1.20
PDB: 1jr3\_E\* 1xxh\_E\* 1xxi\_E\* 3glf\_E\* 3glg\_E\* 3glh\_E\* 3gli\_E\*
Probab=89.53 E-value=2 Score=42.11 Aligned\_cols=123 Identities=11% Similarity=0.056 Sum\_probs=0.0

Q ss\_pred cCCCCHHHHHHHHHHhhcCCCCCceEEEEcCcccHHHH-HHHHHHH-----HhccccCce
Q lqvr\_A 379 YQGDEKLWKRSTFLEKHLNSSHPRSQPALLLTAARDAEAL-RCLSEQIATA-----DAYSSFRSRA 441 (583)
Q Consensus 379 PPsQse-LWkrlr--LekhLnts-Pr-ePAVLLtA--Ae-TL-qClae-IA-----daySS--s--a 441 (583)

Q ss\_pred eEecCccccCh-hHHHHHHHHHHhhcCCcEEEEehhhCCHHHHHHHhhcCCCCcCcccEEEEE
Q lqvr\_A 442 I-RDGTDKATQDS-DTVKLEVDQELNSGPKNGQAAVHRFESFPAGSTLIFKYCDHENAAFKDVALVLT 511 (583)
Q Consensus 442 I-IDG--a--DS-D-vKleIDeqLks-F--g-kaAVVh-LE-LPP-AaLIIFH-YCDHENA-fkDValfLT 511 (583)

No 5 [Icons: PDB, SCOP, NCBI, PubMed]

>1jr3\_A DNA polymerase III subunit gamma; processivity, processivity clamp, clamp loader, AAA+ ATPase, transferase; HET: DNA; 2.70A {Escherichia coli}; SCOP: a.80.1.1 c.37.1.20 PDB: 1xxh\_B\* 3glh\_B\* 3glf\_B\* 3gli\_B\* 3glg1xxi\_B\*
Probab=89.00 E-value=5.9 Score=39.15 Aligned\_cols=158 Identities=14% Similarity=0.173 Sum\_probs=0.0

Q ss\_pred HHHHHHHHHhhcCCCCCceEEEEcCcccHHHHHHHHHHHH-----hccccCceEEcCc
Q lqvr\_A 388 KRSTFLEKHLNSSHPRSQPALLLTAARDAEALRCLSEQIADA-----YSSFRSRAIRIDGT 447 (583)
Q Consensus 388 krlr--LekhLnts-Pr-ePAVLLtA--Ae-TLqClae-IA-----ySS--s--aI-IDG- 447 (583)

Q ss\_pred cccccChHHHHHHHHHHhhcCCcEEEEehhhCCHHHHHHHhhcCCCCcCcccEEEEEeccccccC-----
Q lqvr\_A 448 DKATQDSDTVKLEVDQELNSGPKNGQAAVHRFESFPAGSTLIFKYCDHENAAFKDVALVLTVLEETLGT----- 521 (583)
Q Consensus 448 --a--DSD-vKleIDeqLks-F--g-kaAVVh-LE-LPP-AaLIIFH-YCDHENA-fkDValfLTV-leeetl----- 521 (583)
